# Supplementary material for: Suppression of halide migration and immobile ionic surface passivation for blue perovskite light-emitting diodes
Source: Royal Society of Chemistry journal article supplement (doi:10.1039/d1tc05714f), 2022-01-01
Supplement: d1tc05714f1.pdf [file d1tc05714f1.pdf]

## Supporting Information for

### **Suppression of Halide Migration and Immobile Ionic Surface Passivation for Blue Perovskite Light-Emitting Diodes**

*Chan Beom Park,<sup>‡a</sup> Yun Seop Shin,<sup>‡a</sup> Yung Jin Yoon,<sup>a</sup> Hyungsu Jang,<sup>a</sup> Jung Geon Son,<sup>a</sup> Seongheon Kim,<sup>c</sup> Na Gyeong An,<sup>a</sup> Jae Won Kim,<sup>a</sup> Young Chul Jun,<sup>cd</sup> Gi-Hwan Kim,<sup>\*b</sup> and Jin Young Kim<sup>\*a</sup>*

<sup>a</sup>. Perovtronics Research Center, Department of Energy Engineering, Ulsan National Institute of Science and Technology, Ulsan 44919, South Korea. E-mail: [jykim@unist.ac.kr](mailto:jykim@unist.ac.kr)

<sup>b</sup>. School of Materials Science and Engineering, Gyeongsang National University, Jinju 52828, Republic of Korea. E-mail: [ghkim@gnu.ac.kr](mailto:ghkim@gnu.ac.kr)

<sup>c</sup>. Department of Materials Science and Engineering, UNIST, Ulsan 44919, Republic of Korea.

<sup>d</sup>. Graduate School of Semiconductor Materials and Devices Engineering, UNIST, Ulsan 44919, Republic of Korea.

\*Correspondence: [jykim@unist.ac.kr](mailto:jykim@unist.ac.kr), [ghkim@gnu.ac.kr](mailto:ghkim@gnu.ac.kr)

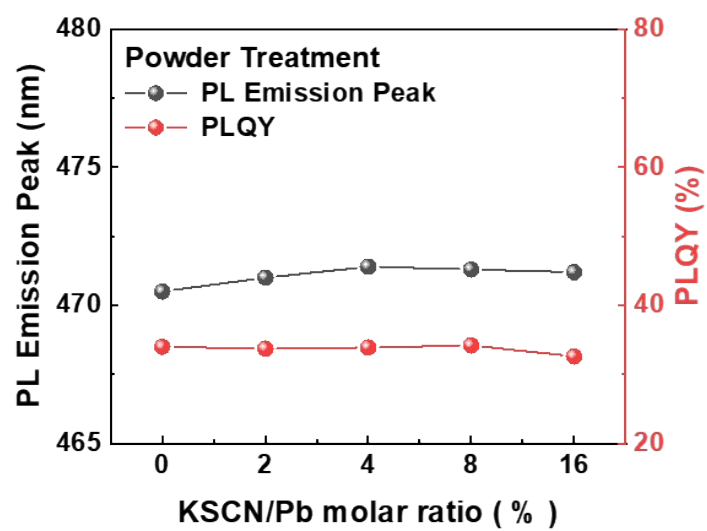

**Fig. S1.** Change in photoluminescence (PL) emission peak and PL quantum yields of PeNCs solution with increasing molar ratio of KSCN powder under same reaction time, 5 min.

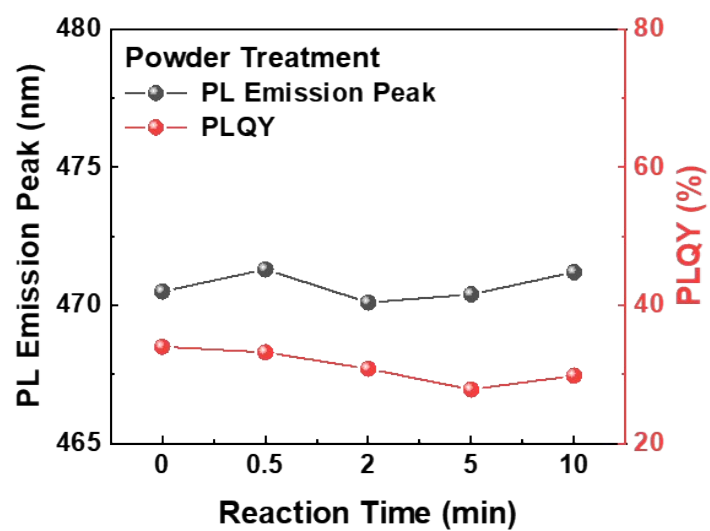

**Fig. S2.** Change in photoluminescence (PL) emission peak and PL quantum yields of PeNCs solution with increasing reaction time under same molar ratio of 8% KSCN powder.

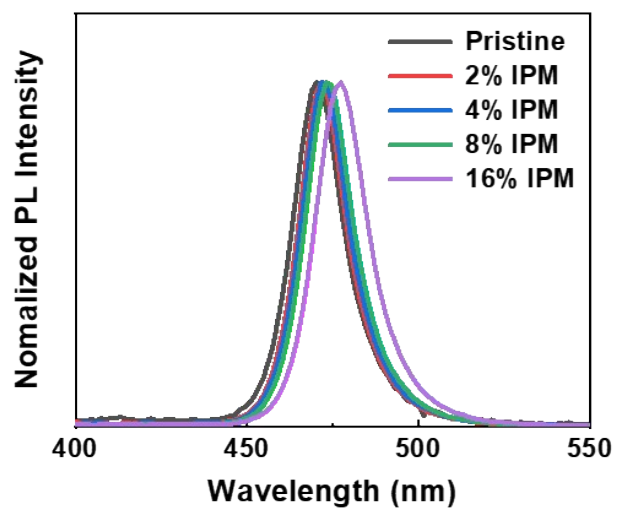

**Fig. S3.** Photoluminescence spectra of p- and IPM-PeNCs with increasing KSCN molar ratio. (KSCN power were dissolved in butanol with different molar ratio)

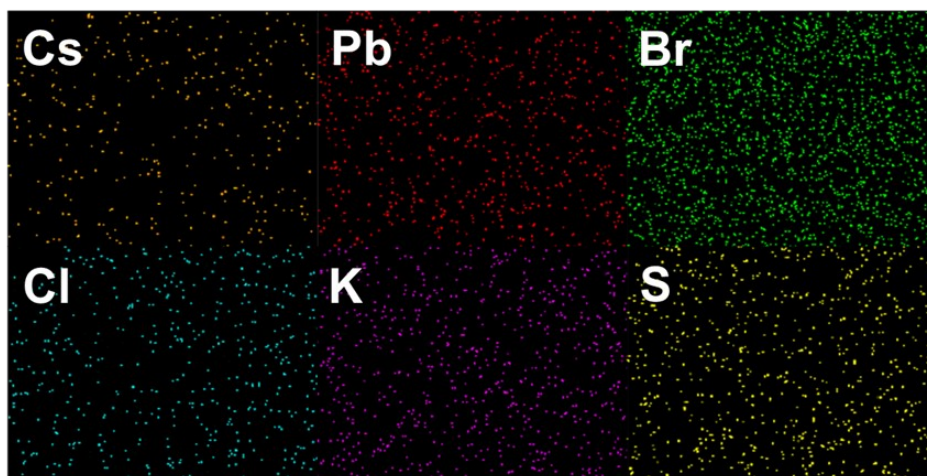

**Fig. S4.** Energy-dispersive X-ray spectroscopy images of deposited 8% IPM-PeNCs film for elemental mapping of Cs, Pb, Br, Cl, K, and S.

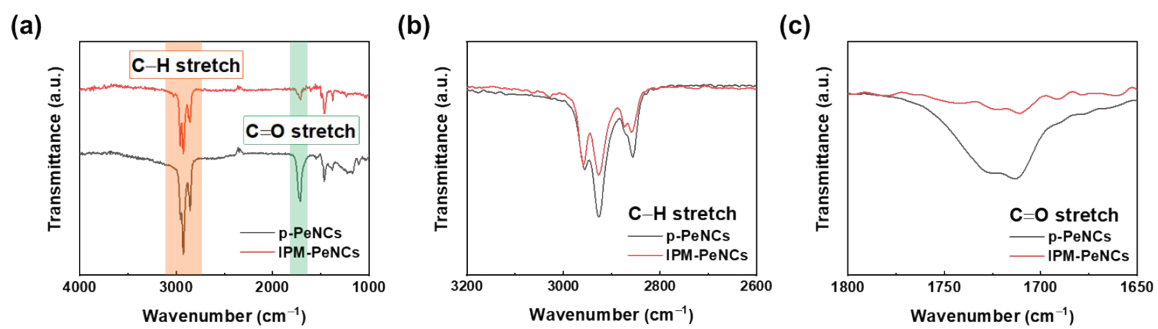

**Fig. S5.** (a) Fourier-transform infrared spectra of p- and 8% IPM-PeNCs solutions. (b, c) C-H stretch and C=O stretch regions, respectively.

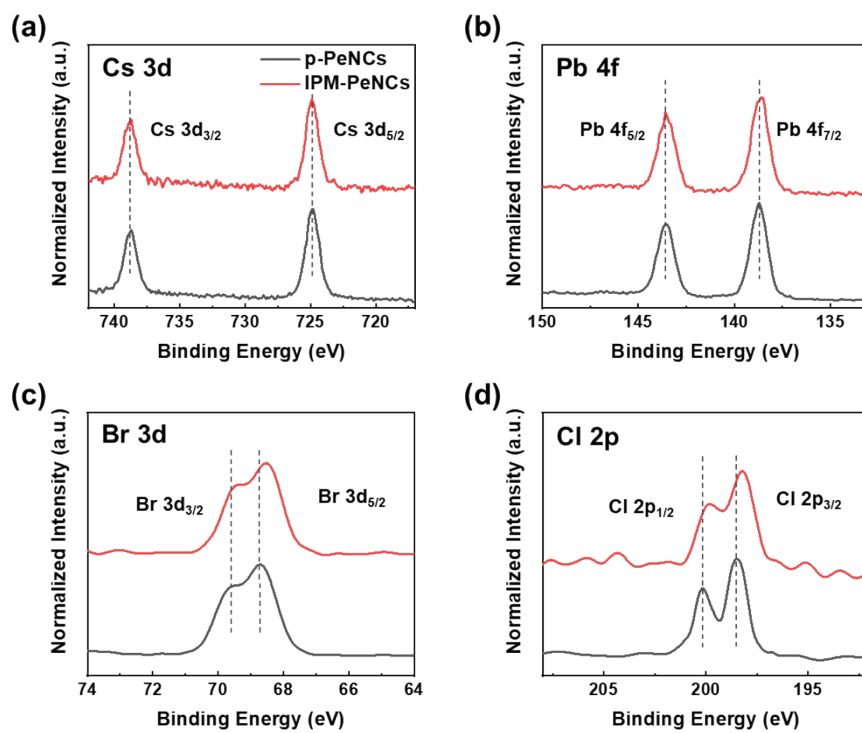

**Fig. S6.** X-ray photoelectron spectroscopy spectra corresponding to the (a) Cs 3d, (b) Pb 4f, (c) Br 3d and (d) Cl 2p core-level peak of p- and 8% IPM-PeNCs.

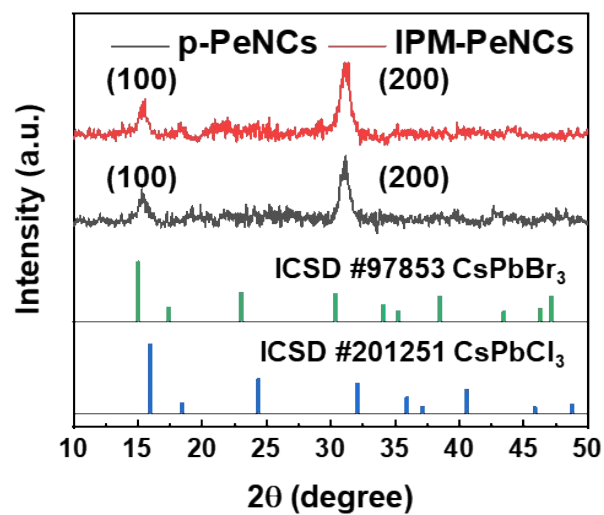

**Fig. S7.** X-ray diffraction patterns of deposited p- and 8% IPM-PeNCs films.



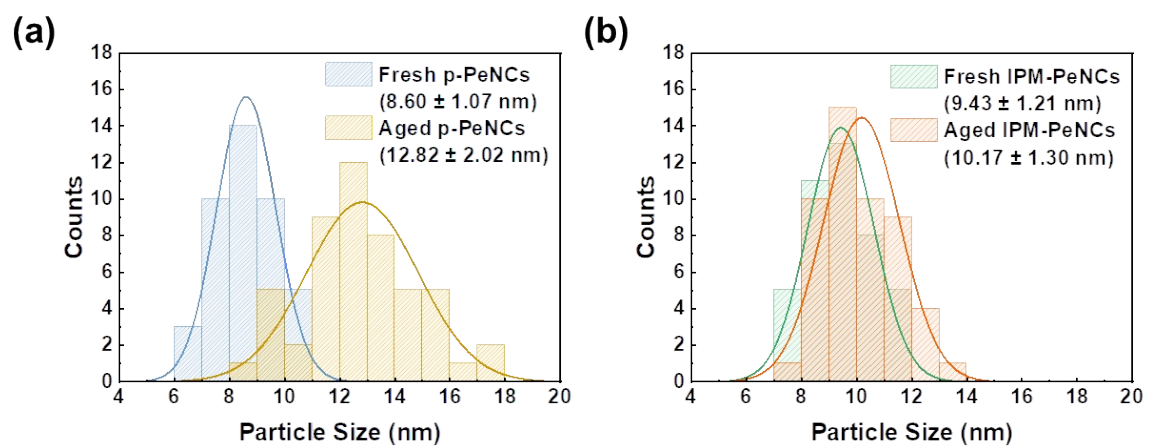

**Fig. S8.** Size distributions of (a) p- and (b) 8% IPM-PeNCs just synthesized and after 14 days obtained from transmission electron microscopy images.

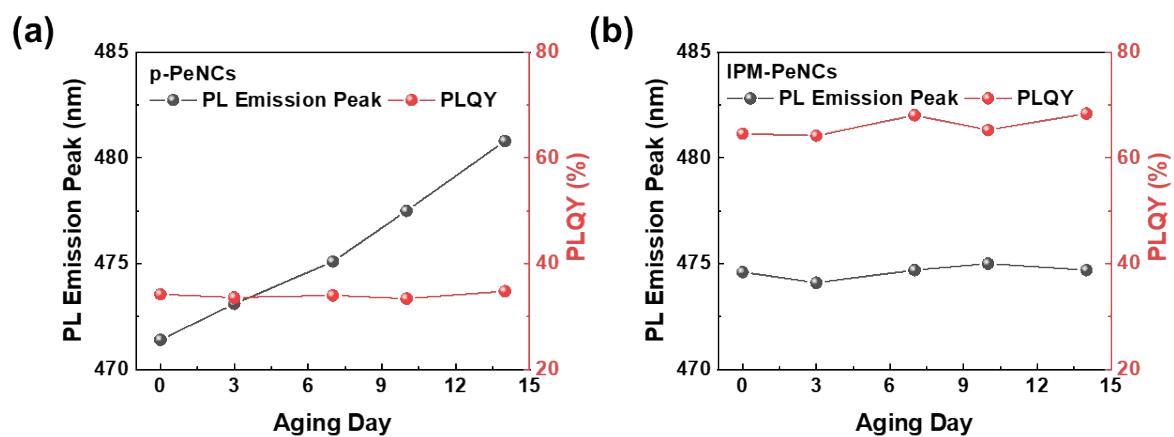

**Fig. S9.** Change in photoluminescence (PL) emission peak and PL quantum yields of p- and 8% IPM-PeNCs just synthesized and after being kept in ambient condition of over 60% humidity for 14 days.

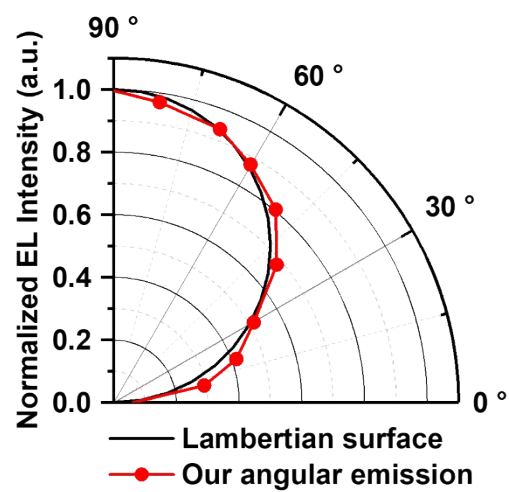

**Fig. S10.** Angular distribution of radiation intensity.

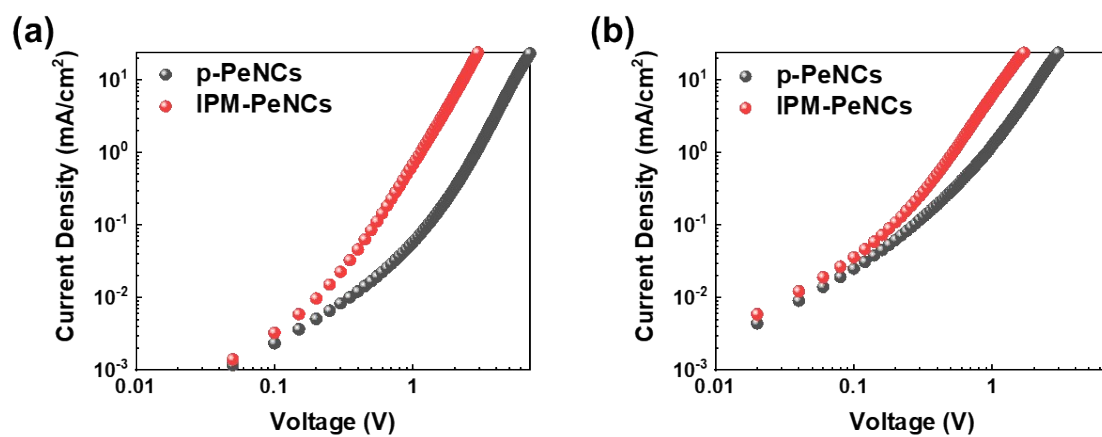

**Fig. S11.**  $J$ - $V$  curves of (a) hole-only diodes and (b) electron-only diodes based on p- and 8% IPM PeNCs. Device structure: ITO/PEDOT:PSS (30 nm)/Poly-TPD (35 nm)/PeNCs (15 nm)/MoO<sub>3</sub> (5 nm)/Au (80 nm) for hole-only diodes, ITO/ZnO (25 nm)/PeNCs (15 nm)/TPBi (50 nm)/LiF (1 nm)/Al (100 nm) for electron-only diodes.

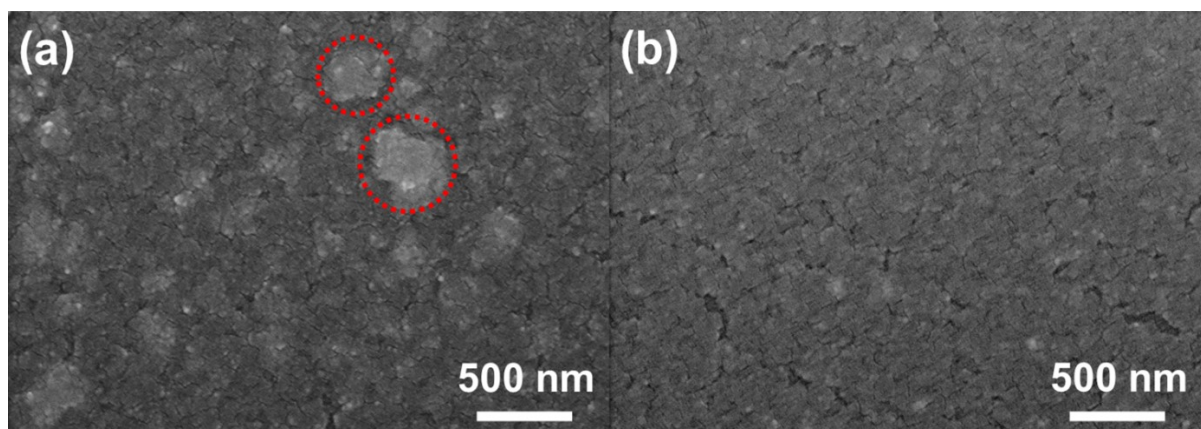

**Fig. S12.** Scanning electron microscope images of deposited (a) p- and (b) 8% IPM-PeNCs films.

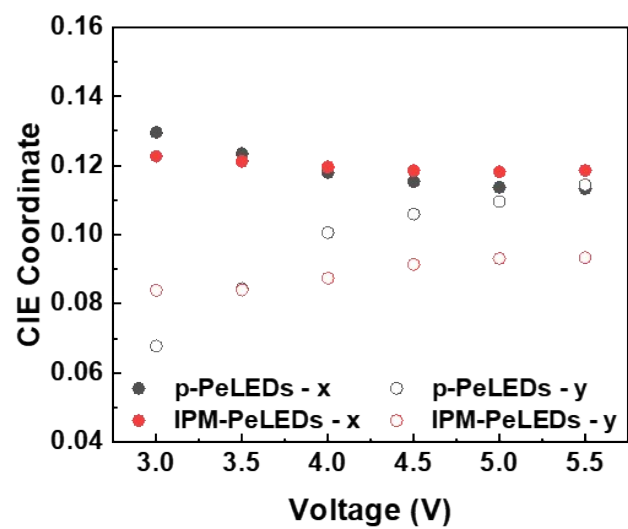

**Fig. S13.** CIE 1931 chromatic coordinates of p- and IPM-PeLEDs at different applying bias, respectively.

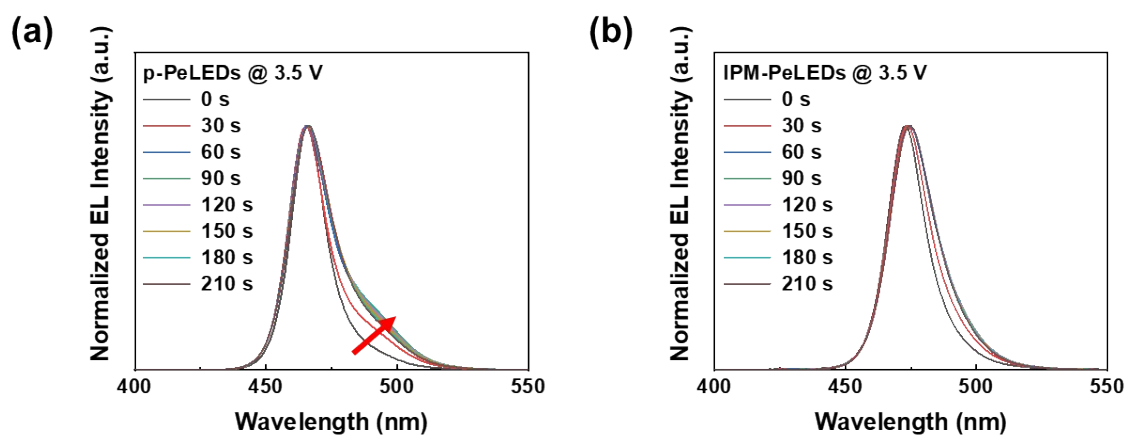

**Fig. S14.** Electroluminescence (EL) spectra peak positions at different operation times and fixed bias of 3.5 V for p- and IPM-PeLEDs.

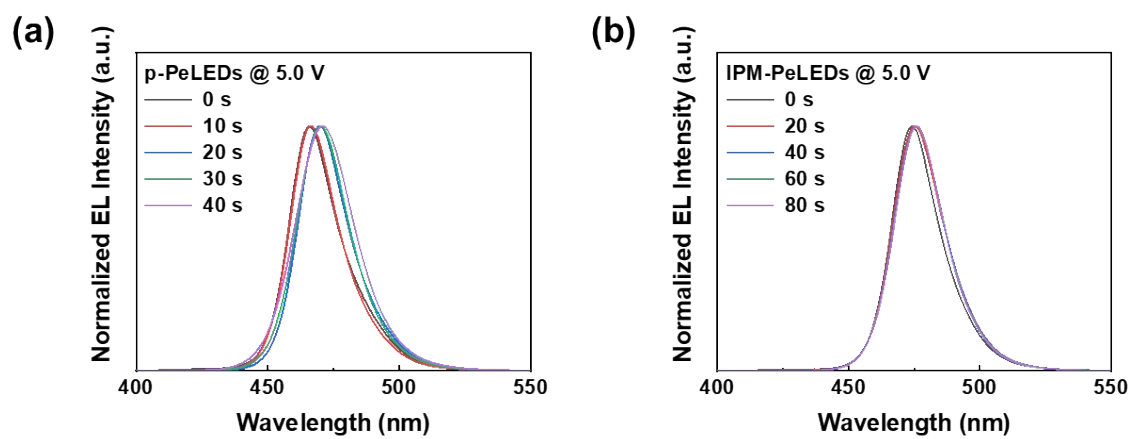

**Fig. S15.** Electroluminescence (EL) spectra peak positions at different operation times and fixed bias of 5.0 V for p- and IPM-PeLEDs.



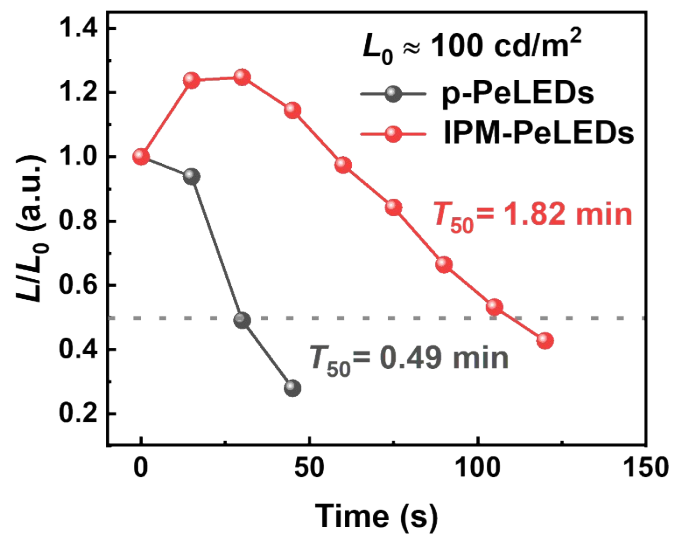

**Fig. S16.** Operational stability under continuous fixed bias, 5.0 V of p- and IPM-PeLEDs.

**Table S1.** Summary of optical parameters (PL peak positions and PLQY values) of p- and IPM-PeNCs solution with increasing molar ratio of KSCN powder under same reaction time,

| <b>Condition</b>    | <b>Pristine</b> | <b>2% IPM</b> | <b>4% IPM</b> | <b>8% IPM</b> | <b>16% IPM</b> |
|---------------------|-----------------|---------------|---------------|---------------|----------------|
| <b>PL peak (nm)</b> | 470.5           | 471.0         | 471.4         | 471.3         | 471.2          |
| <b>PLQY (%)</b>     | 34.0            | 33.7          | 33.9          | 34.2          | 32.6           |

5 min.

**Table S2.** Summary of optical parameters (PL peak positions and PLQY values) of p- and IPM-PeNCs solution with increasing reaction time under same molar ratio of 8% KSCN

| <b>Condition</b>    | <b>Pristine</b> | <b>0.5 min</b> | <b>2 min</b> | <b>5 min</b> | <b>10 min</b> |
|---------------------|-----------------|----------------|--------------|--------------|---------------|
| <b>PL peak (nm)</b> | 470.5           | 471.0          | 471.4        | 471.3        | 471.2         |
| <b>PLQY (%)</b>     | 34.0            | 33.2           | 30.8         | 27.8         | 29.8          |

powder

**Table S3.** Summary of optical parameters (PL peak positions and PLQY values) of p- and IPM-PeNCs solution with increasing KSCN molar ratio.

| <b>Condition</b>    | <b>Pristine</b> | <b>2% IPM</b> | <b>4% IPM</b> | <b>8% IPM</b> | <b>16% IPM</b> |
|---------------------|-----------------|---------------|---------------|---------------|----------------|
| <b>PL peak (nm)</b> | 470.5           | 471.7         | 472.4         | 473.6         | 477.1          |
| <b>PLQY (%)</b>     | 34.0            | 51.4          | 58.3          | 64.0          | 74.1           |

**Table S4.** Tri-exponential fitting parameter for PL lifetimes of p-and 8% IPM-PeNCs

| <b>Condition</b> | $\tau_1$ (ns) | $f_1$ (%) | $\tau_2$ (ns) | $f_2$ (%) | $\tau_3$ (ns) | $f_3$ (%) | $\tau_{\text{avg}}$ (ns) | $\chi^2$ |
|------------------|---------------|-----------|---------------|-----------|---------------|-----------|--------------------------|----------|
| <b>p-PeNCs</b>   | 33.60         | 34.59     | 4.54          | 53.14     | 169.25        | 12.28     | 34.81                    | 1.22     |
| <b>IPM-PeNCs</b> | 246.36        | 11.70     | 55.78         | 36.71     | 8.17          | 51.59     | 53.52                    | 1.28     |

solutions.

**Table S5.** Summary of device characteristics of optimized PeLEDs based on p- and IPM-

| <b>Condition</b> | <b>Maximum<br/>Luminance<br/>[cd/m<sup>2</sup>] [at voltage]</b> | <b>Maximum<br/>Luminous<br/>Efficiency<br/>[cd/A] [at voltage]</b> | <b>EQE<br/>[%] [at voltage]</b> | <b>EL<br/>[nm]</b> |
|------------------|------------------------------------------------------------------|--------------------------------------------------------------------|---------------------------------|--------------------|
| <b>Pristine</b>  | 291.8@6.5                                                        | 0.45@4.0                                                           | 0.60@4.0                        | 469                |
| <b>2% IPM</b>    | 298.1@6.0                                                        | 0.60@4.0                                                           | 0.78@4.0                        | 470                |
| <b>4% IPM</b>    | 286.3@6.0                                                        | 0.73@4.0                                                           | 0.92@3.0                        | 472                |
| <b>8% IPM</b>    | 221.5@5.5                                                        | 1.73@3.5                                                           | 2.04@3.5                        | 475                |

PeNCs with increasing KSCN molar ratio<sup>a</sup><sup>a</sup>Device structure: ITO/PEDOT:PSS/Poly-TPD/PeNCs/TPBi/LiF/Al.
